# Supplementary material for: Influence of mycotoxin zearalenone and its derivatives (alpha and beta zearalenol) on apoptosis and proliferation of cultured granulosa cells from equine ovaries
Source: Springer Nature journal article supplement (doi:10.1186/1477-7827-4-62), 2006-11-30

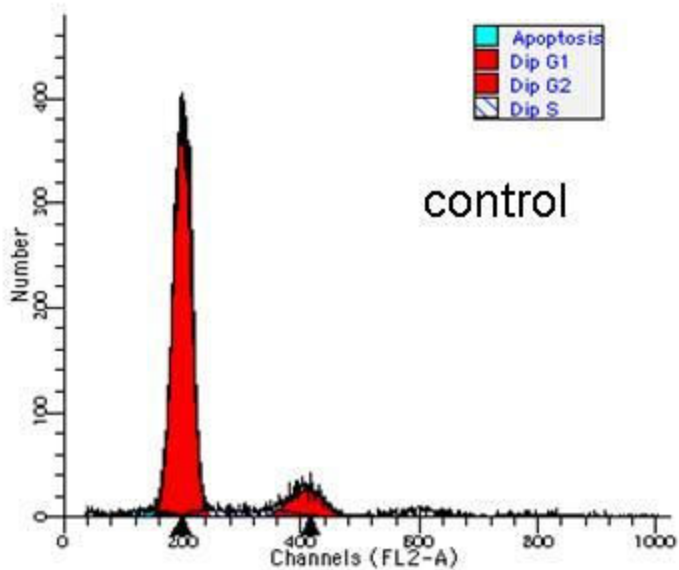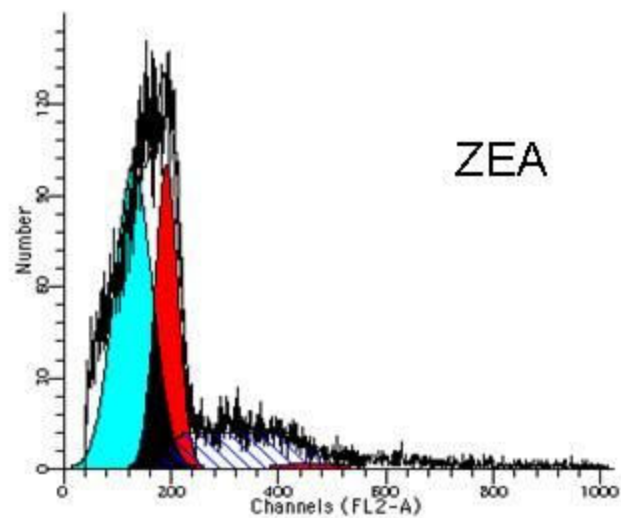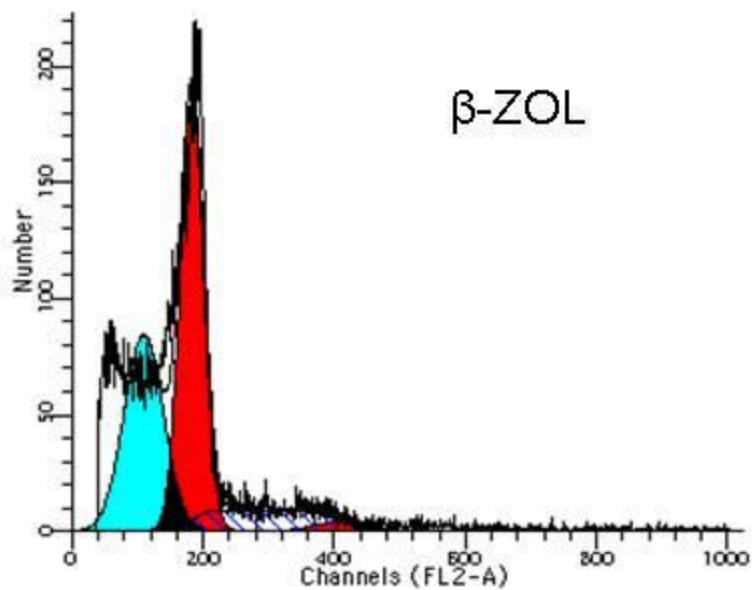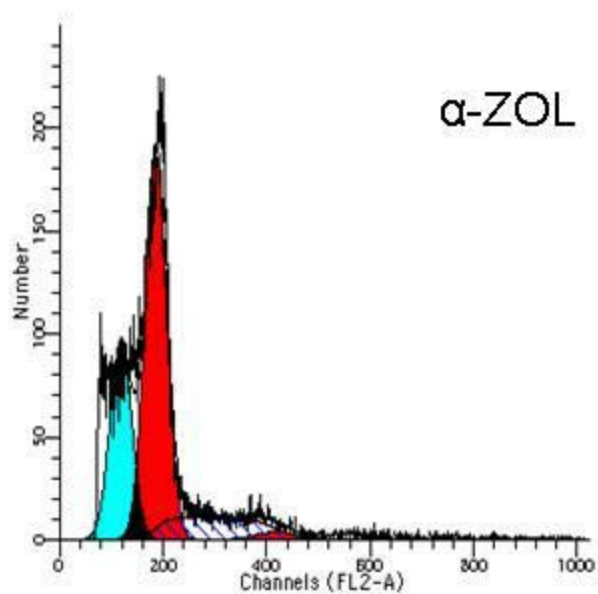

Supplement: 12958_2006_344_MOESM2_ESM.pdf [file 12958_2006_344_MOESM2_ESM.pdf]
